# Supplementary material for: Synthesis, characterization and application of TiO2/Ag recyclable SERS substrates
Source: Royal Society of Chemistry journal article supplement (doi:10.1039/c7ra03112b), 2017-01-01
Supplement: c7ra03112b1.pdf [file c7ra03112b1.pdf]

Supplementary Information

## **Synthesis, characterization and application of TiO<sub>2</sub>/Ag recyclable SERS substrates**

**Qingli Huang**<sup>1,3</sup>, **Jing Li**<sup>2</sup>, **Wenxian Wei**<sup>3</sup>, **Yongping Wu**<sup>1\*</sup> and **Ting Li**<sup>1\*</sup>

*Received (in XXX, XXX) Xth XXXXXXXXXX 20XX, Accepted Xth XXXXXXXXXX 20XX*

DOI: 10.1039/b000000x

---

\* To whom correspondence should be addressed. Fax: ++86-516-83262091.

E-mail: 100002016057@xzhmu.edu.cn , wyp@xzhmu.edu.cn

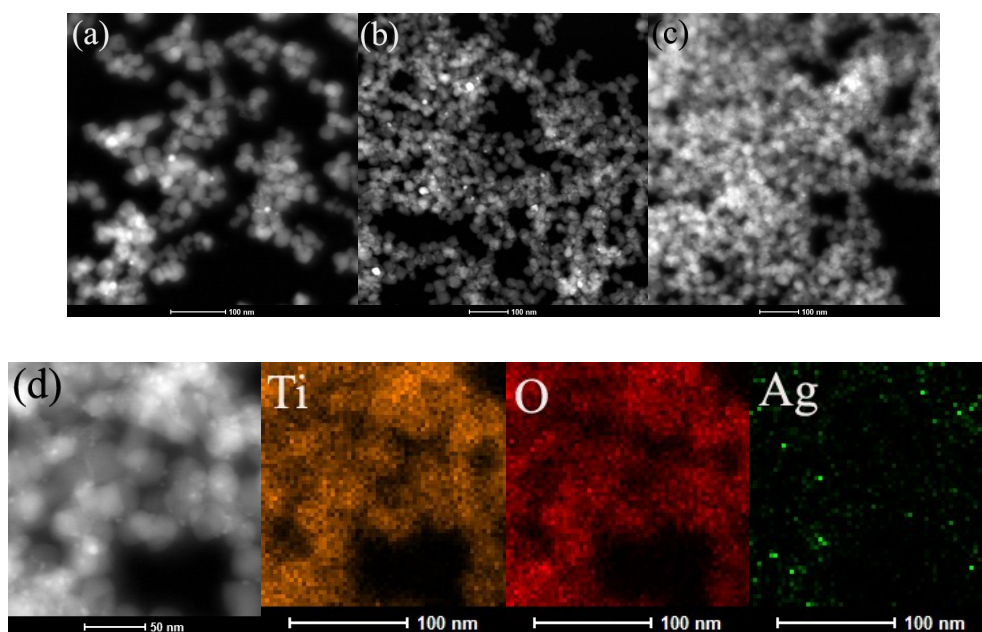

Fig. S1. STEM images of (a)  $S_{a1}$  (b)  $S_{a2}$  (c, d)  $S_{a3}$  and (d) the corresponding EDS mapping of  $S_{a3}$

SERS spectra acquired per 20 min were adopted to track the process of self-cleaning of RB in Fig S2, which further indicated that the TiO<sub>2</sub>/Ag nanocomposites acted as excellent SERS self-cleaning substrates.

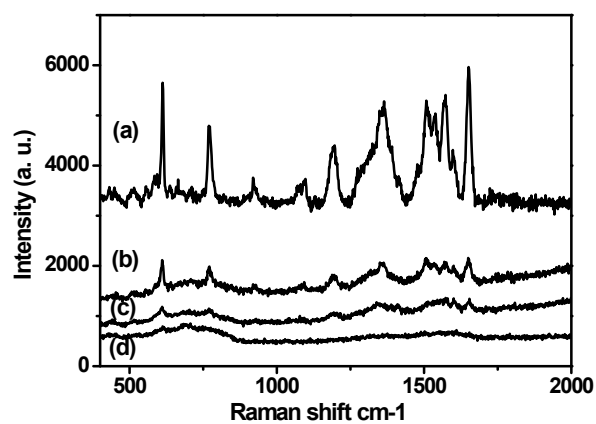

Fig. S2. SERS spectra of RB acquired per 20 min after UV-visible irradiation on S<sub>r3</sub> (a) 0 min (b) 20 min (c) 40 min (d) 60 min.

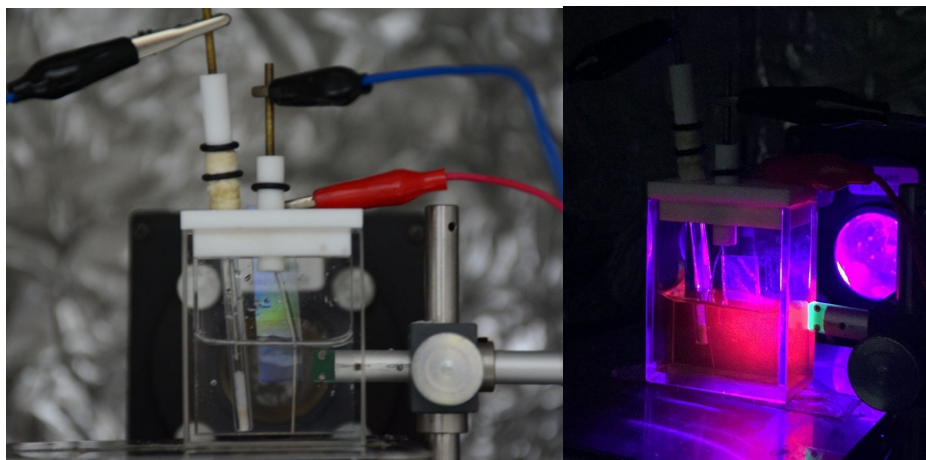

Fig. S3. The photo of photocurrent experiment.
